# Supplementary material
Source: Springer Nature journal article supplement (https://www.springermedizin.de/resource/supplementary/12936_2007_377_MOESM1_ESM.pdf/9547672)
Supplement: MOESM1 [file 9547672]

# Treat your loved ones for malaria with AL

AL, the complete malaria treatment

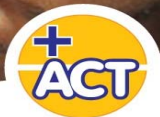

Tibu malaria kabisa

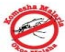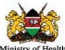

**Coartem<sup>®</sup> 20/120**  
Artemether Lumefantrine

WEIGHT: 5 – 15 kg

0 hrs DAY 1 8 hrs Morning DAY 2 Night time Morning DAY 3 Night time

DAY 1 DAY 2 DAY 3
